# Supplementary material for: Thermal Inactivation of a Cold-Active Esterase PMGL3 Isolated from the Permafrost Metagenomic Library
Source: MDPI journal article supplement (doi:10.3390/biom9120880), 2019-12-16

**Supplementary Material** to the manuscript “**Thermal inactivation of a cold-active esterase PMGL3 isolated from the permafrost metagenomic library**” by M.V. Kryukova et al.

**Table S1.** Content of the secondary structure elements in PMGL3 and mutant variants obtained by CD spectroscopy at different temperatures.

| Protein      | Temperature, °C | $\alpha$ -helix, % | $\beta$ -sheet, % | unregular, % |
|--------------|-----------------|--------------------|-------------------|--------------|
| <b>PMGL3</b> | 20              | 31.3               | 16.6              | 52.1         |
|              | 30              | 30.6               | 18.1              | 51.3         |
|              | 40              | 27.3               | 20.5              | 52.1         |
|              | 50              | 15.6               | 27.9              | 56.5         |
| <b>C49V</b>  | 20              | 32.8               | 17.8              | 49.5         |
|              | 30              | 31.0               | 17.5              | 51.6         |
|              | 40              | 27.8               | 19.2              | 53.0         |
|              | 50              | 17.6               | 26.9              | 55.5         |
| <b>C207F</b> | 20              | 29.6               | 22.7              | 47.7         |
|              | 30              | 28.2               | 23.7              | 48.0         |
|              | 40              | 27.4               | 22.7              | 49.9         |
|              | 50              | 16.2               | 31.4              | 52.4         |

**Figure S1.** Location of cysteine residues and residues belonging to the catalytic triad in the PMGL3 molecule. Ribbon presentations are colored according to the predicted secondary structure of the protein; green and blue elements indicate  $\alpha$ -helices and  $\beta$ -sheets, respectively. A structure model of PMGL3 was generated using SWISS-MODEL server based on PDB entry 5GMR as a template and drawn using Swiss-PdbViewer.

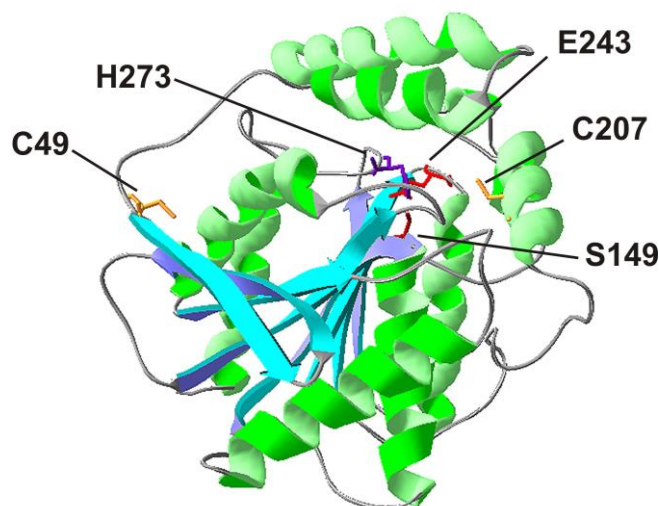

**Figure S2.** Characteristic fluorescence decay kinetics of bis-ANS in the buffer and in protein solutions of PMGL3 and mutant variants at 25°C.

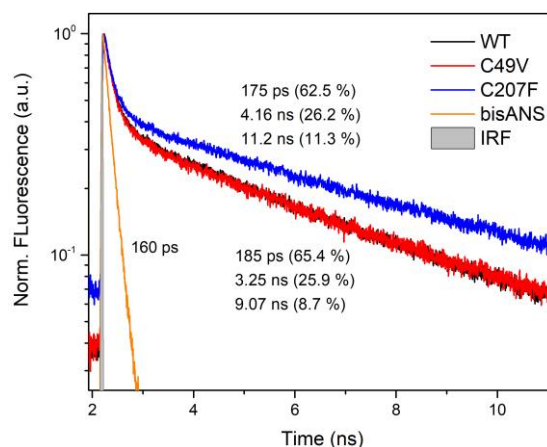

**Figure S3.** Melting of PMGL3 and mutant variants as revealed by bis-ANS fluorescence (**A**) and intrinsic Trp fluorescence (**B**).

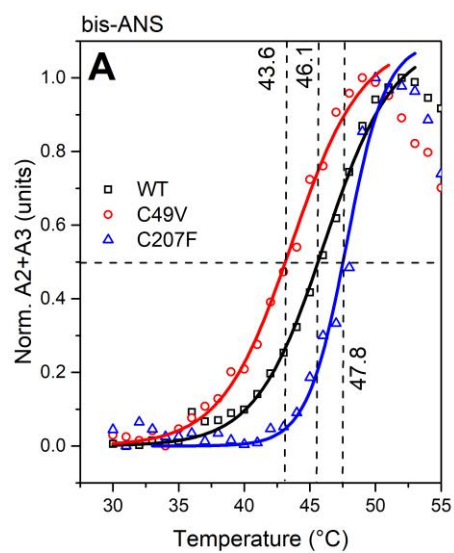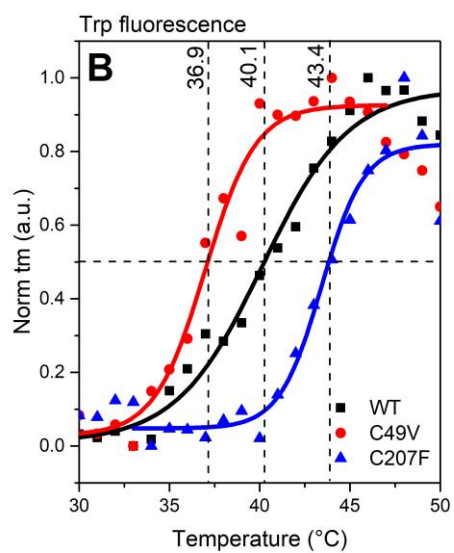

Supplement: s1 [file s1]
